# Supplementary material for: Superior adsorptive removal of anionic dyes by MIL-101 analogues: the effect of free carboxylic acid groups in the pore channels
Source: Royal Society of Chemistry journal article supplement (doi:10.1039/c9ce01224a), 2019-01-01
Supplement: c9ce01224a1.pdf [file c9ce01224a1.pdf]

*Electronic Supplementary Information (ESI)*

**Superior adsorptive removal of anionic dyes by MIL-101 analogues: Effect of free carboxylic acid groups in the pore channel**

Ji-Min Yang\*, Run-Zhi Zhang, Ying-Yan Liu

**School of Chemistry & Chemical Engineering, Linyi University, Linyi 276005, China**

E-mail: yangjimin@lyu.edu.cn

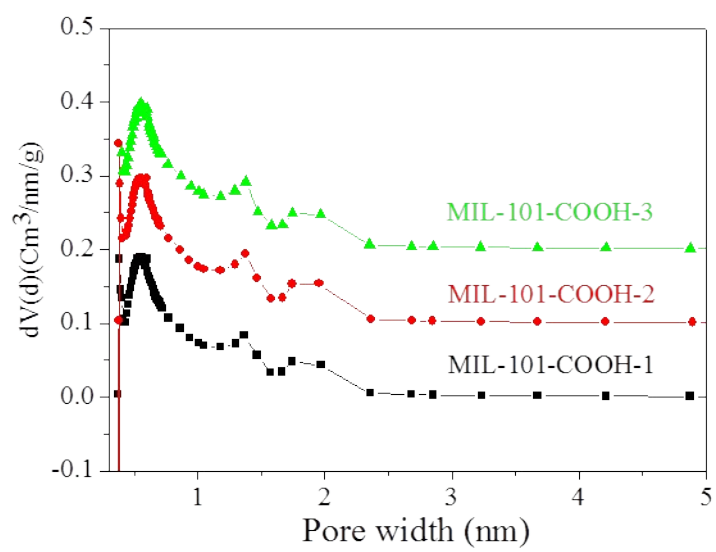

**Fig. S1** The pore size distributions of MIL-101-COOH microcrystals.

**Table S1** Summary of CR maximum adsorption capacities ( $q$ ) on various adsorbents.

| Type of adsorbent                                           | $q$ (mg g <sup>-1</sup> ) | Reference |
|-------------------------------------------------------------|---------------------------|-----------|
| MIL-101-COOH-1                                              | 2835.7                    | This work |
| MIL-101(Cr)-2                                               | 1367.1                    | 3         |
| MIL-68(In)                                                  | 1204                      | 17        |
| Ce(III)-doped UiO-66                                        | 1033.2                    | 33        |
| Ni-Cu-BTC                                                   | 999.2                     | 34        |
| Mesoporous alumina fibers                                   | 781.3                     | 35        |
| [Co(L <sub>2</sub> )(Htp)(tp) <sub>0.5</sub> ] <sub>n</sub> | 629.6                     | 36        |
| Hierarchical hollow NiO                                     | 440                       | 37        |
| α-FeOOH                                                     | 275                       | 38        |
| Activated carbon                                            | 200                       | 39        |

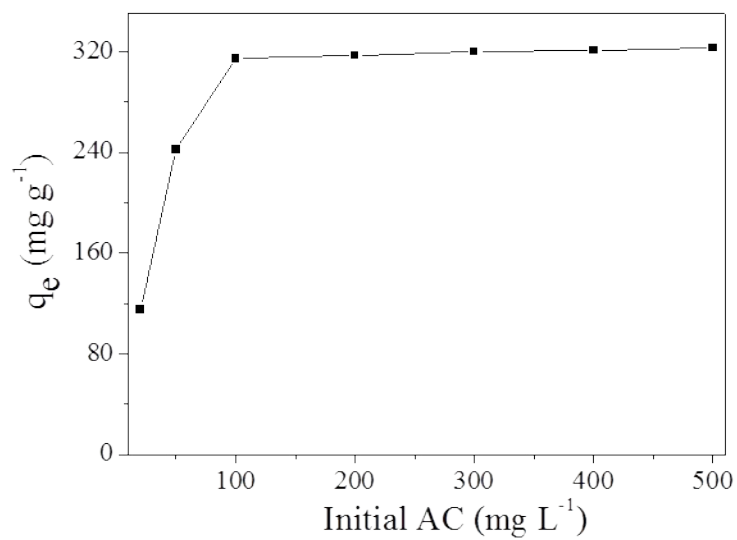

**Fig. S2** Adsorption uptake of AC by MIL-101-COOH after 24 h, as determined by dispersing 5 mg of MIL-101-COOH in solutions of the organic dyes (50 mL) at room temperature.

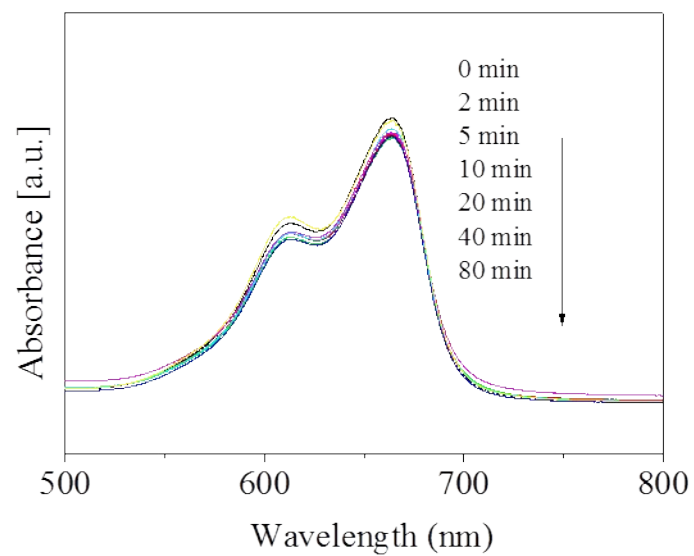

**Fig. S3** UV-vis absorption spectra of a solution of MB ( $20 \text{ mg L}^{-1}$ ,  $50 \text{ mL}$ ) in the presence of MIL-101-COOH-1 ( $10 \text{ mg}$ ) at different time intervals.

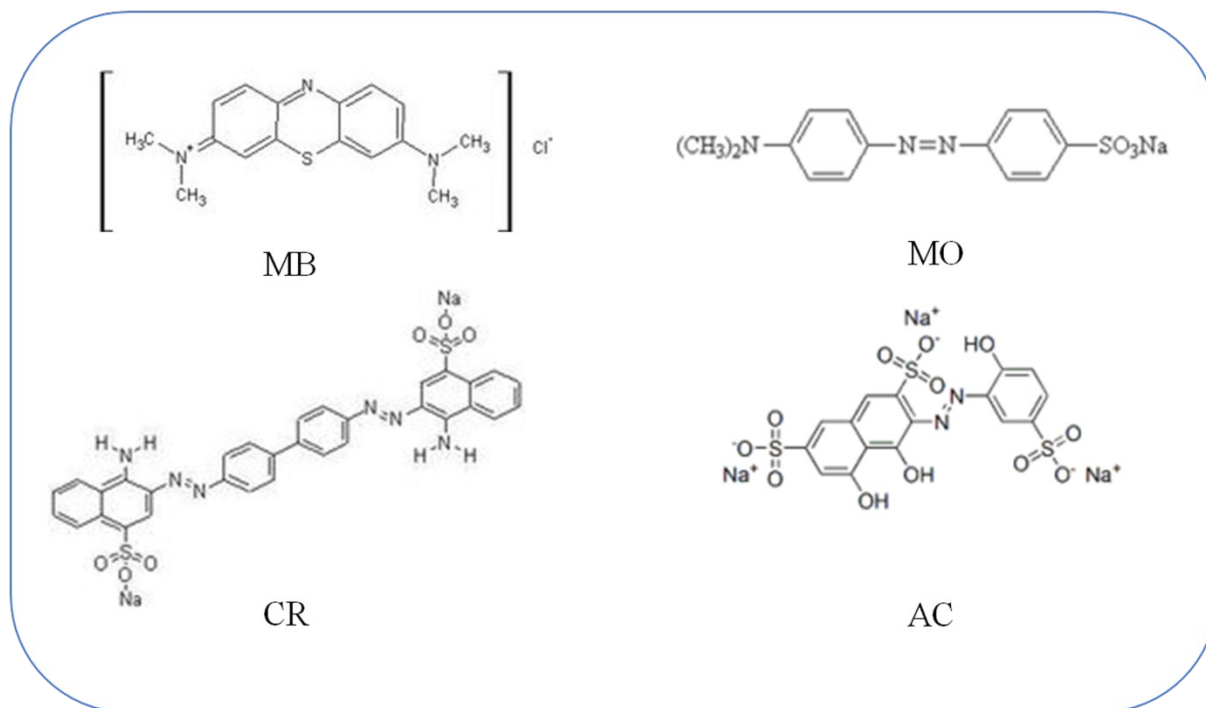

**Fig. S4** Molecular structures of the investigated dyes.

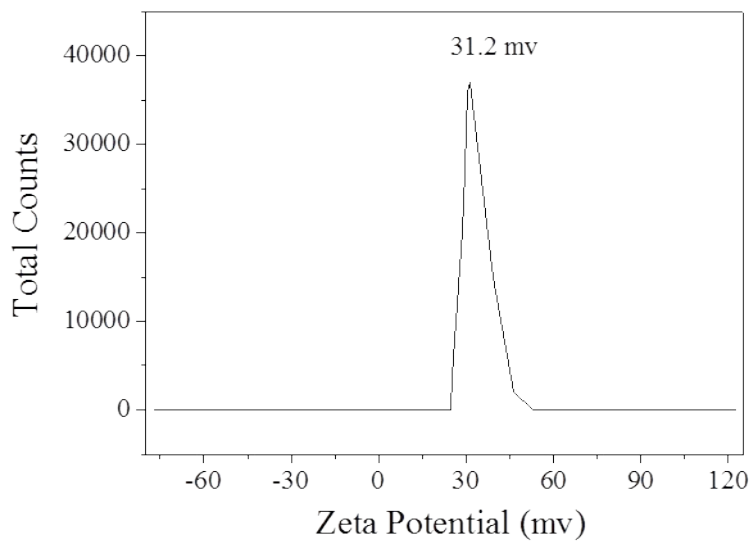

**Fig. S5** Zeta potential of MIL-101-COOH-1 microparticles directly dispersed in water.

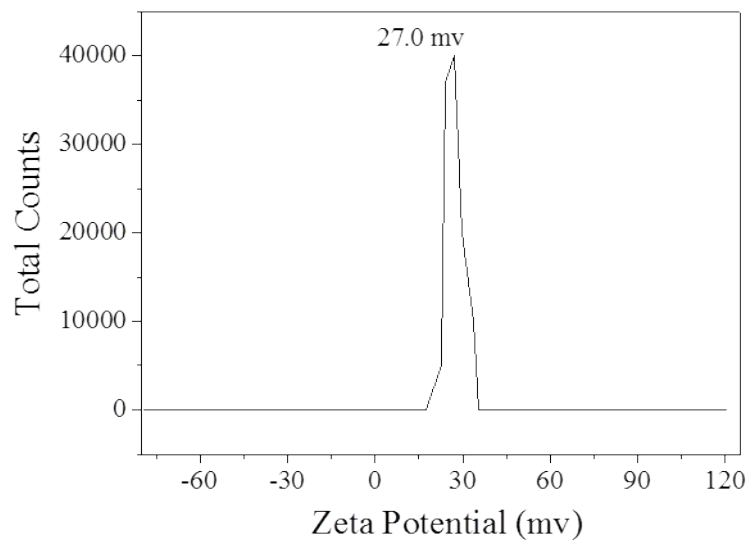

**Fig. S6** Zeta potential of MIL-101-COOH-2 microparticles directly dispersed in water.



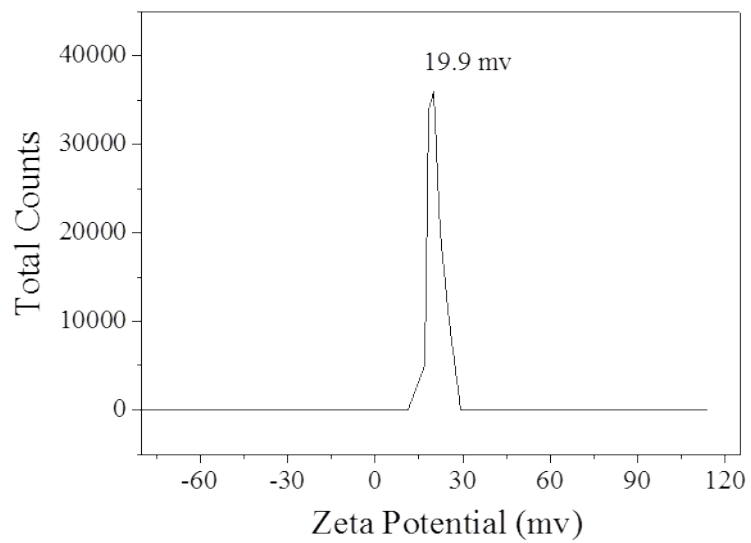

**Fig. S7** Zeta potential of MIL-101-COOH-3 microparticles directly dispersed in water.

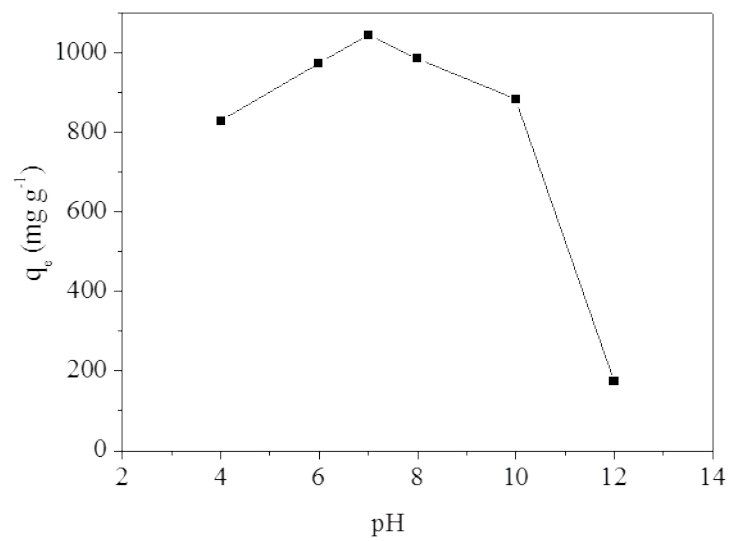

**Fig. S8** Effect of pH on CR adsorption on the MIL-101-COOH-1 microcrystals.

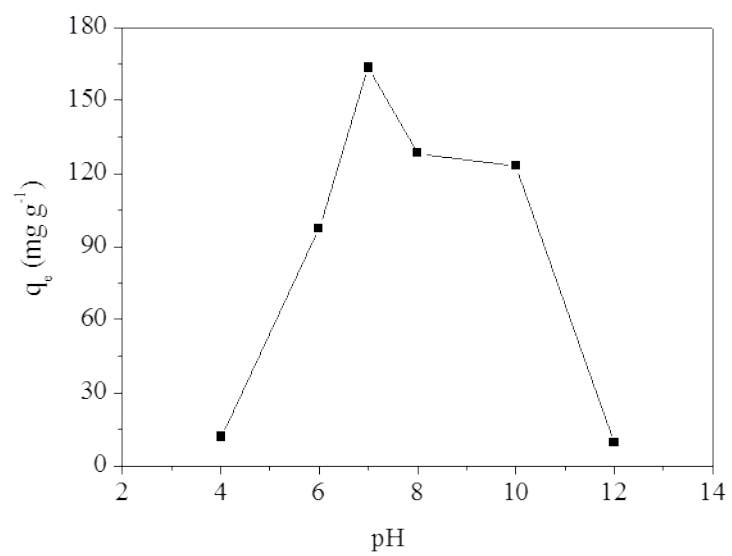

**Fig. S9** Effect of pH on MO adsorption on the MIL-101-COOH-1 microcrystals.

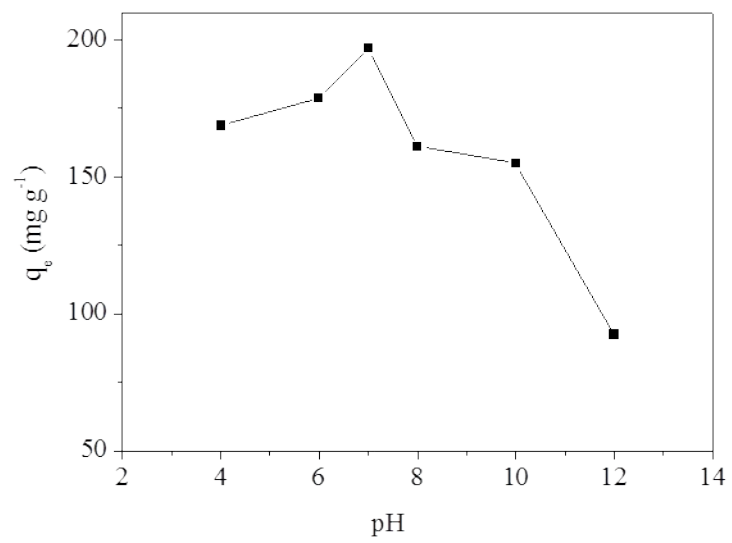

**Fig. S10** Effect of pH on AC adsorption on the MIL-101-COOH-1 microcrystals.

**Table S2** Characteristic parameters of the adsorption of CR on the MIL-101-COOH.

|                        |                                    | parameters                                                       | MIL-101-COOH-1       | MIL-101-COOH-2       | MIL-101-COOH-3       |
|------------------------|------------------------------------|------------------------------------------------------------------|----------------------|----------------------|----------------------|
| Adsorption kinetics    | Pseudo-first-order                 | $q_{e,Exp}$ (mg g <sup>-1</sup> )                                | 1043.5               | 1071.9               | 964.7                |
|                        |                                    | $q_{e,Cal}$ (mg g <sup>-1</sup> )                                | 392.2                | 469.4                | 480.6                |
|                        |                                    | $k_1$ (min <sup>-1</sup> )                                       | 0.0069               | 0.0095               | 0.0092               |
|                        |                                    | $R^2$                                                            | 0.8289               | 0.9263               | 0.9531               |
|                        | Pseudo-second-order                | $q_{e,Exp}$ (mg g <sup>-1</sup> )                                | 1043.5               | 1071.9               | 964.7                |
|                        |                                    | $q_{e,Cal}$ (mg g <sup>-1</sup> )                                | 826.4                | 819.7                | 729.9                |
|                        |                                    | $k_2$ (g mg <sup>-1</sup> min <sup>-1</sup> )                    | $2.3 \times 10^{-5}$ | $3.5 \times 10^{-5}$ | $7.7 \times 10^{-5}$ |
|                        |                                    | $R^2$                                                            | 0.9999               | 0.9995               | 0.9993               |
| Adsorption isotherm    | Tempkin                            | $A$ (L g <sup>-1</sup> )                                         | 16.8                 | 7.0                  | 27.1                 |
|                        |                                    | $B$                                                              | 634.9                | 431.4                | 326.7                |
|                        |                                    | $R^2$                                                            | 0.9298               | 0.8652               | 0.9402               |
|                        | Freundlich                         | $n$                                                              | 1.8                  | 2.5                  | 2.7                  |
|                        |                                    | $k_F$ (mg g <sup>-1</sup> (L mg <sup>-1</sup> ) <sup>1/n</sup> ) | 44.8                 | 118.8                | 64.5                 |
|                        |                                    | $R^2$                                                            | 0.9072               | 0.7194               | 0.8519               |
|                        | Langmuir                           | $q_{m,Exp}$ (mg g <sup>-1</sup> )                                | 2835.7               | 2185.7               | 1887.5               |
|                        |                                    | $q_{m,Cal}$ (mg g <sup>-1</sup> )                                | 3146.2               | 2259.7               | 1989.0               |
|                        |                                    | $b$ (L mg <sup>-1</sup> )                                        | 0.0513               | 0.1309               | 0.0613               |
|                        |                                    | $R^2$                                                            | 0.9941               | 0.9994               | 0.9998               |
| Thermodynamic constant | $\Delta G$ (kJ mol <sup>-1</sup> ) | -7.4                                                             | -5.0                 | -6.9                 |                      |

**Table S3** Characteristic parameters of the adsorption of MO on the MIL-101-COOH.

|                        |                                    | parameters                                                       | MIL-101-COOH-1       | MIL-101-COOH-2       | MIL-101-COOH-3       |
|------------------------|------------------------------------|------------------------------------------------------------------|----------------------|----------------------|----------------------|
| Adsorption kinetics    | Pseudo-first-order                 | $q_{e,Exp}$ (mg g <sup>-1</sup> )                                | 304.6                | 263.1                | 232.0                |
|                        |                                    | $q_{e,Cal}$ (mg g <sup>-1</sup> )                                | 61.9                 | 64.4                 | 68.9                 |
|                        |                                    | $k_1$ (min <sup>-1</sup> )                                       | 0.0124               | 0.0338               | 0.0571               |
|                        |                                    | $R^2$                                                            | 0.8171               | 0.9306               | 0.9715               |
|                        | Pseudo-second-order                | $q_{e,Exp}$ (mg g <sup>-1</sup> )                                | 304.6                | 263.1                | 232.0                |
|                        |                                    | $q_{e,Cal}$ (mg g <sup>-1</sup> )                                | 278.6                | 268.1                | 237.5                |
|                        |                                    | $k_2$ (g mg <sup>-1</sup> min <sup>-1</sup> )                    | $4.6 \times 10^{-3}$ | $2.5 \times 10^{-3}$ | $2.3 \times 10^{-3}$ |
|                        |                                    | $R^2$                                                            | 0.9999               | 0.9999               | 0.9998               |
| Adsorption isotherm    | Tempkin                            | $A$ (L g <sup>-1</sup> )                                         | 6.0                  | 8.7                  | 57.8                 |
|                        |                                    | $B$                                                              | 62.8                 | 48.6                 | 31.4                 |
|                        |                                    | $R^2$                                                            | 0.9963               | 0.9933               | 0.9888               |
|                        | Freundlich                         | $n$                                                              | 4.8                  | 5.8                  | 7.6                  |
|                        |                                    | $k_F$ (mg g <sup>-1</sup> (L mg <sup>-1</sup> ) <sup>1/n</sup> ) | 148.7                | 143.5                | 145.8                |
|                        |                                    | $R^2$                                                            | 0.9759               | 0.9843               | 0.9888               |
|                        | Langmuir                           | $q_{m,Exp}$ (mg g <sup>-1</sup> )                                | 473.9                | 405.6                | 319.3                |
|                        |                                    | $q_{m,Cal}$ (mg g <sup>-1</sup> )                                | 487.8                | 409.8                | 319.5                |
|                        |                                    | $b$ (L mg <sup>-1</sup> )                                        | 0.0836               | 0.0568               | 0.0928               |
|                        |                                    | $R^2$                                                            | 0.9996               | 0.9981               | 0.9989               |
| Thermodynamic constant | $\Delta G$ (kJ mol <sup>-1</sup> ) | -6.1                                                             | -7.1                 | -5.9                 |                      |

**Table S4** Characteristic parameters of the adsorption of AC on the MIL-101-COOH.

|                        |                                    | parameters                                                       | MIL-101-COOH-1       | MIL-101-COOH-2        | MIL-101-COOH-3       |
|------------------------|------------------------------------|------------------------------------------------------------------|----------------------|-----------------------|----------------------|
| Adsorption kinetics    | Pseudo-first-order                 | $q_{e,Exp}$ (mg g <sup>-1</sup> )                                | 196.6                | 183.9                 | 176.0                |
|                        |                                    | $q_{e,Cal}$ (mg g <sup>-1</sup> )                                | 121.1                | 120.2                 | 114.9                |
|                        |                                    | $k_1$ (min <sup>-1</sup> )                                       | 0.0026               | 0.0039                | 0.0040               |
|                        |                                    | $R^2$                                                            | 0.8281               | 0.8528                | 0.9224               |
|                        | Pseudo-second-order                | $q_{e,Exp}$ (mg g <sup>-1</sup> )                                | 196.6                | 183.9                 | 176.0                |
|                        |                                    | $q_{e,Cal}$ (mg g <sup>-1</sup> )                                | 142.6                | 138.5                 | 136.1                |
|                        |                                    | $k_2$ (g mg <sup>-1</sup> min <sup>-1</sup> )                    | $7.9 \times 10^{-3}$ | $4.5 \times 10^{-3}$  | $3.7 \times 10^{-3}$ |
|                        |                                    | $R^2$                                                            | 0.9999               | 0.9979                | 0.9988               |
| Adsorption isotherm    | Tempkin                            | $A$ (L g <sup>-1</sup> )                                         | $1.25 \times 10^7$   | $3.95 \times 10^{13}$ | $2.3 \times 10^{14}$ |
|                        |                                    | $B$                                                              | 8.7                  | 5.7                   | 5.1                  |
|                        |                                    | $R^2$                                                            | 0.9144               | 0.8908                | 0.9451               |
|                        | Freundlich                         | $n$                                                              | 24.9                 | 35.3                  | 36.8                 |
|                        |                                    | $k_F$ (mg g <sup>-1</sup> (L mg <sup>-1</sup> ) <sup>1/n</sup> ) | 185.2                | 178.2                 | 171.9                |
|                        |                                    | $R^2$                                                            | 0.9227               | 0.9022                | 0.9510               |
|                        | Langmuir                           | $q_{m,Exp}$ (mg g <sup>-1</sup> )                                | 240.8                | 220.2                 | 208.2                |
|                        |                                    | $q_{m,Cal}$ (mg g <sup>-1</sup> )                                | 243.9                | 219.7                 | 207.0                |
|                        |                                    | $b$ (L mg <sup>-1</sup> )                                        | 0.1387               | 0.1246                | 0.1792               |
|                        |                                    | $R^2$                                                            | 0.9996               | 0.9991                | 0.9994               |
| Thermodynamic constant | $\Delta G$ (kJ mol <sup>-1</sup> ) | -4.9                                                             | -5.1                 | -4.2                  |                      |

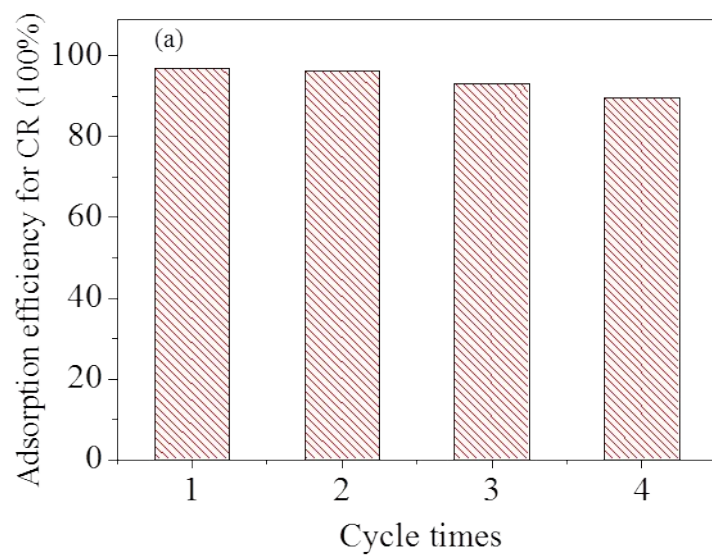

**Fig. S8** Recycle of the removal efficiency of MIL-101-COOH-1 for CR.
